# Supplementary material for: Forward Programming of Cardiac Stem Cells by Homogeneous Transduction with MYOCD plus TBX5
Source: PubMed Central journal article supplement (PMC4457652; doi:10.1371/journal.pone.0125384), 2015-06-05

**A**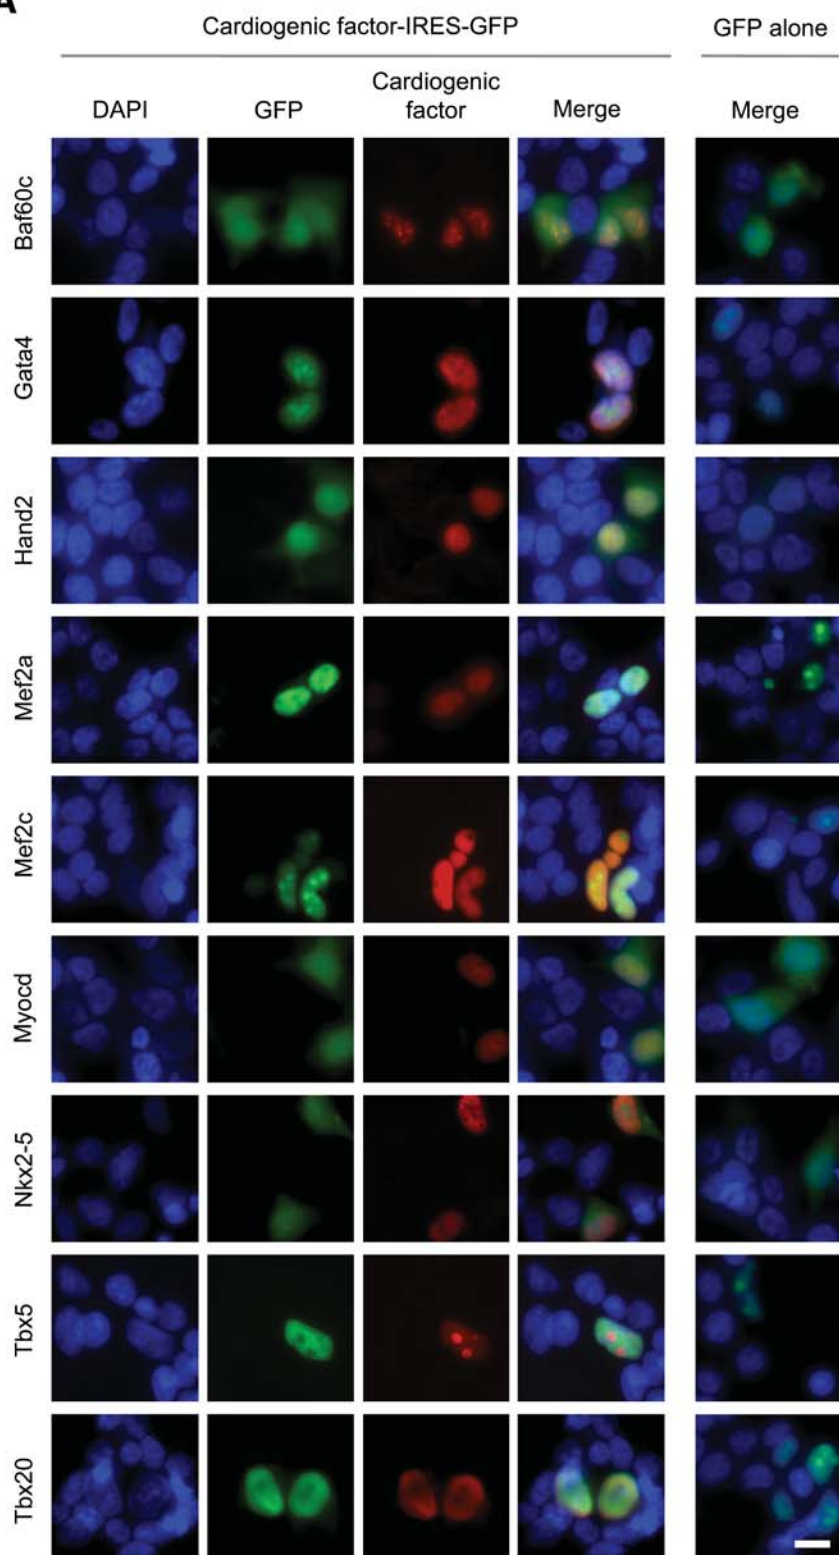**B**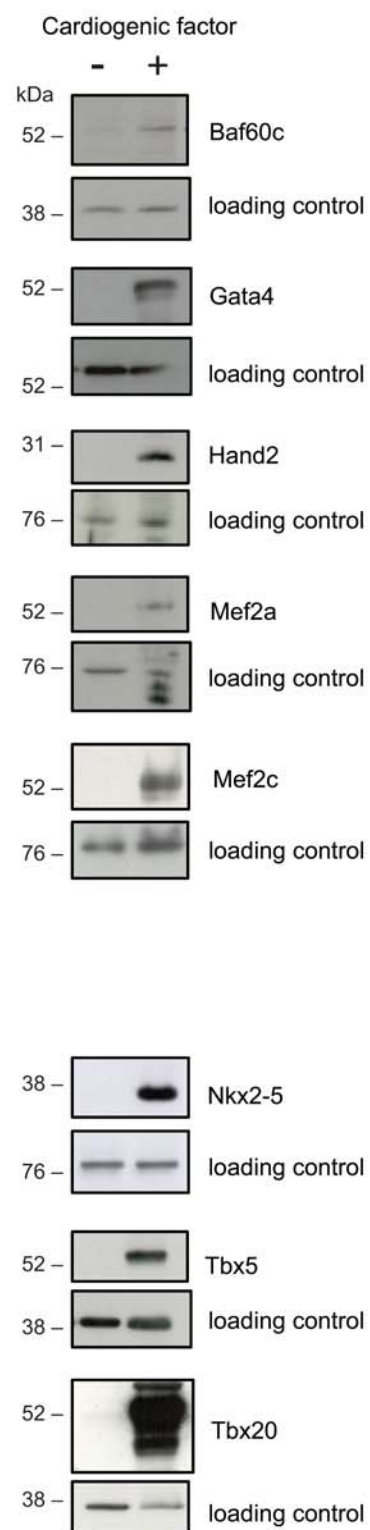

Supplement: pone.0125384.s001.pdf [file pone.0125384.s001.pdf]
